1 **Characterisation of the R2R3 Myb subgroup 9 family of transcription factors in tomato**

2 Gwen. V. Davis, Beverley. J. Glover.

3 Department of Plant Sciences, University of Cambridge, Downing Street, Cambridge CB2 3EA.

4 Author for correspondence: Beverley Glover.

5 Telephone: 44 1223 333938

Email: [bjg26@cam.ac.uk](mailto:bjg26@cam.ac.uk)

6

[Gwen.Davis@hotmail.co.uk](mailto:Gwen.Davis@hotmail.co.uk)

7 Date of submission: 8<sup>th</sup> January 2021

8 Number of tables and figures: 1 table 5 figures

9 Word count: 4998

10 Running title: **Characterisation of R2R3 Myb subgroup 9 family in tomato**

11 Acknowledgements:

12 We thank Matthew Dorling for excellent care of plants, Sam Brockington for help with  
13 phylogenetic analysis, and members of the Glover lab for helpful discussions. GVD was  
14 supported by the Natural Environment Research Council (grant number NE/L002507/1).

15 Author contribution and references:

16 BJG conceived of the idea and supervised the project. BJG and GVD designed the experiments  
17 and developed the idea. GVD performed the experiments. GVD and BJG wrote the manuscript.  
18 The manuscript was edited by GVD and BJG

19 Tables and supporting information: 3 supplementary figures, 1 supplementary table

20 **Highlight:**

21 **Characterisation of all members of an important family of transcription factors within**  
22 **tomato showing that all are able to induce epidermal cell outgrowths to varying degrees.**

23 **Abstract:**

24 Tomato (*Solanum lycopersicum*) has many epidermal cell outgrowths including conical cells and  
25 multiple types of trichomes. These include the anther-specific trichome mesh which holds the  
26 anthers connate. The R2R3 Myb Subgroup 9 family of transcription factors is involved in  
27 development of epidermal cell outgrowths throughout the angiosperms. No previous study has  
28 examined all members of this transcription factor family in a single species. All 7 *R2R3 Myb*  
29 *Subgroup 9* genes were isolated from tomato. They were ectopically expressed in tobacco to  
30 assess their ability to induce epidermal cell outgrowth. Endogenous expression patterns were  
31 examined by semi-quantitative RT-PCR at different stages of floral development relative to the  
32 development of anther trichomes. We report variation in the degree of epidermal cell outgrowth  
33 produced in transgenic tobacco for each ectopically expressed gene. Based on expression profile  
34 and ectopic activity, *SIMIXTA-2* is likely involved in the production of leaf trichomes while  
35 *SIMYB17-2* is the best candidate for the regulation of the anther trichome mesh. Analysis of the  
36 phenotypes of transgenic plants ectopically expressing all 7 genes has revealed the different  
37 extent to which members of the same transcription factor subfamily can induce cellular  
38 outgrowth.

39 Keywords: epidermal outgrowth, *MIXTA*, R2R3 Myb Subgroup 9 transcription factor, *Solanum*,  
40 tomato, trichome, transcription

41

42

## 43 **Introduction:**

44 The R2R3 Myb proteins are a plant specific family of transcription factors which contain two  
45 copies of the Myb DNA binding domain (Meese et al, 1989) and carry out plant-specific  
46 functions (Martin and Paz-Ares, 1997; Kranz et al, 1998; Dubos et al, 2010.) The family can be  
47 divided into subgroups based on other conserved motifs usually external to the Myb domain  
48 (Stracke et al, 2001; Dubos et al, 2010). Some of these subgroups have been shown to regulate  
49 specific functions and phenotypes.

50 The R2R3 Myb Subgroup 9 subfamily of proteins is an ancient lineage (Brockington et al, 2013)  
51 that is especially important in the control of epidermal cell modification. Members of this protein  
52 family have the R2R3 Myb DNA binding domain composed of the R2 and R3 repeats (Jin and  
53 Martin, 1999) and also share their own subgroup 9 domain which forms a conserved motif  
54 around 30 peptides downstream from the second MYB repeat (Strake, Weber and Weisshaar,  
55 2001). Duplication within this subgroup early in seed plant evolution led to the creation of two  
56 gene lineages: 9A and 9B (Brockington et al, 2013). These lineages underwent further  
57 duplication and sub functionalisation, leading to four clades of genes within the R2R3 subgroup  
58 9 family in the eudicots (Brockington et al, 2013). These four subclades were named by  
59 Brockington et al (2013): subgroup 9A: *MIXTA* and *MIXTA-like*; and subgroup 9B: *Myb17* and  
60 *Myb17-like*. Subgroup 9A and 9B proteins have been shown to perform a range of functions in  
61 the control of epidermal cell outgrowth, but the roles of the subgroup 9B proteins are less well  
62 understood than those of subgroup 9A (Brockington et al, 2013).

63 R2R3 Myb Subgroup 9 proteins are involved in the regulation of expression of genes involved in  
64 directional cell outgrowth: producing trichomes, conical cells and papillae. These epidermal cell  
65 outgrowths have been shown, in some cases, to follow the same developmental pathway, with  
66 differences in the timing of expression resulting in the different morphologies. For example, if  
67 cell division has finished when cell outgrowth occurs then expression can result in conical cells,  
68 however expression during cell division may result in the development of multicellular trichomes  
69 (Glover et al, 1998). A role for these genes in the regulation of epidermal cell outgrowth has  
70 been demonstrated in a variety of species and shown to be conserved throughout the angiosperms  
71 in *Antirrhinum majus* (Noda et al, 1994), *Petunia hybrida* (Baumann et al, 2007), *Arabidopsis*  
72 *thaliana* (Baumann et al, 2007), *Thalictrum thalictroides* (Di Stilio et al, 2009), cotton fibre  
73 initiation and development (Walford et al, 2011) and elongation (Machado et al, 2009), *Mimulus*  
74 *guttatus* (Scoville et al, 2011), *Medicago truncatula* (Gilding and Marks, 2010) and in *Lotus*  
75 *japonicus* (Brockington et al, 2013). R2R3 Myb subgroup 9 genes were first shown to be  
76 involved in epidermal cell outgrowth in *Antirrhinum majus* where the expression of the subgroup  
77 9A gene *MIXTA* in the petal epidermis was found to be necessary for the formation of conical  
78 cells (Noda et al, 1994). It was further shown that the *MIXTA* gene was also sufficient for the  
79 production of conical cells when ectopically expressed in *Antirrhinum* and in heterologous hosts  
80 (Glover et al, 1998; Martin et al, 2002.) However, despite the wealth of studies examining  
81 individual members of this transcription factor family, no study has examined all members of the

82 subgroup 9 family from a single species and so it has not been possible to date to draw  
83 conclusions about relative functions and phenotypic effects of the different members of the  
84 family.

85 *Solanum lycopersicum* (tomato) is an economically important crop plant. All species of the genus  
86 *Solanum* are buzz pollinated. Tomatoes produce multiple types of trichomes on all epidermal  
87 surfaces of the plant and there is considerable diversity in the density, morphology and chemical  
88 composition of trichomes (Schilmiller et al, 2008). Three main types of glandular trichomes have  
89 been described in *Solanum lycopersicum*, (type I, VI and VII) as well as two types of non-  
90 glandular trichomes (II and III), (Luckwill, 1943). An additional type of glandular trichome, type  
91 IV, is abundant in the wild tomato species *S. pennellii*, but is absent in cultivated *S. lycopersicum*,  
92 despite the close relationship between these species (Luckwill, 1943; Antonious, 2001). Each of  
93 the types of trichomes found in tomato are morphologically distinct. Of the glandular trichomes,  
94 type I have a multicellular base and long multicellular stalk (approximately 2mm) with a small  
95 glandular tip at the end. The type IV trichomes are shorter with a unicellular base. Type VI  
96 trichomes also have a shorter multicellular stalk (approximately 0.1mm) but with a four celled  
97 glandular tip. Type VII trichomes are even shorter (less than 0.05mm) with a unicellular stalk  
98 and a glandular tip consisting of between four and 8 cells (Luckwill, 1943). The non-glandular  
99 trichomes types found in tomato (I and III) are similar in length, at between 0.2 and 1mm.  
100 However they differ in that Type I have a multicellular base while type III have a unicellular base  
101 (Luckwill, 1943). Trichomes are important in resistance to herbivore attack, by providing  
102 mechanical resistance that obstructs the movement of arthropod herbivores (Kennedy, 2003;  
103 Simmons et al, 2005), making the plant less palatable (Kariyat et al, 2017; Pollard and Briggs,  
104 1984) and, in the case of glandular trichomes, producing secondary metabolites for toxicity or  
105 entrapment of herbivores (Uphof, 1962; Thurston, 1970; Levin, 1973, Wagner et al, 2004).

106 The trichomes of tomato play an additional, highly unusual, role. In tomato the anthers are held  
107 together in a connate structure by a mesh of interlocking trichomes (Glover et al, 2004). These  
108 trichomes are multicellular but short and non-glandular, they are also distinct morphologically  
109 from the other trichome types found elsewhere on tomato. This fused ‘pepper pot’ anther cone is  
110 generally uncommon in the genus *Solanum* but is found in all members of the Tomato subclade  
111 of *Solanum* (including all tomato wild-relatives such as *S. pimpinellifolium* and *S. pennellii*).  
112 *Solanum* flowers are pollinated by pollen-gathering bees, which sonicate the flowers to release  
113 pollen from the pores at their tips, a process known as buzz pollination. The fused cone of  
114 anthers in tomato results in all the anthers being sonicated together as a single unit during buzz  
115 pollination. This is hypothesised to increase pollination efficiency and pollinator foraging  
116 efficiency (Glover et al, 2004).

117 Conical cells are another form of epidermal cell outgrowth found in tomato. Conical cells play an  
118 important role on the petals of many flowers (Kay et al, 1981; Martin and Glover, 2007; Whitney  
119 et al, 2009), where they provide improved grip to pollinating insects interacting with the flower  
120 (Whitney et al, 2009, Alcorn et al, 2012). Conical cells can be found on the petals of tomato,

121 although they have been lost in some other species of the genus *Solanum* (Alcorn, 2013). The  
122 anther trichomes of tomato are unicellular and strongly resemble elongated conical cells, further  
123 supporting a developmental link between these specialised epidermal cell types.

124 Previous work has identified functions for some members of the Myb Subgroup 9 family of  
125 transcription factors in tomato prior to this study. The most studied of these genes is named in  
126 this study *SIMIXTA-like* (Solyc02g088190, a member of the *MIXTA-like* clade of Subgroup 9A)  
127 and was referred to as *SIMixta-like* by Lashbrooke et al (2015). These authors silenced *SIMIXTA-*  
128 *like* in tomato and found that the transcription factor promotes the development of conical cells  
129 in the epidermis of fruit and acts as a positive regulator of fruit cuticular lipid biosynthesis and  
130 assembly. The same gene was identified by Galdon-Armero et al (2000) who used introgression  
131 lines to identify genomic regions involved in epidermal cell outgrowth. The authors used ViGS,  
132 genome editing and overexpression studies to reveal a role for *SIMIXTA-like* as a negative  
133 regulator of leaf trichome development and a positive regulator of petal conical cell outgrowth.  
134 Ewas et al (2016) studied the gene named in this paper *SIMIXTA-3* (Solyc01g010910, a member  
135 of the *MIXTA* clade of Subgroup 9A), which they referred to as *SIMX1* or *SIMIXTAlite-1*. This  
136 gene was shown to be involved in the modulation of drought resistance and also metabolic  
137 processes. Overexpression of *SIMIXTA-3* in tomato resulted in increased drought tolerance and  
138 improved fruit quality, while silencing by RNAi (RNA interference) resulted in the opposite  
139 (Ewas et al, 2016). The transcription factor has also been implicated in trichome initiation (Ewas  
140 et al, 2016).

141 The diversity of epidermal cell outgrowths in tomato make it an ideal model in which to explore  
142 the function of the Myb subgroup 9 genes, with a particular focus on understanding the  
143 development of the unusual anther trichomes.

144

## 145 **Materials and Methods:**

### 146 **RNA extraction and cDNA synthesis**

147 Wild Type (WT) *Solanum lycopersicum* was the cultivar ‘Moneymaker’. For isolation of R2R3  
148 Myb subgroup 9 candidate genes, tissue was harvested from flowers, young leaves, buds of  
149 various floral growth stages, cotyledons, young roots, hypocotyls and apical meristems. These  
150 tissues were pooled. Tissue selection was guided by use of the Tomato efp Browser at  
151 Bar.UToronto.ca, Rose Lab Atlas ([http://bar.utoronto.ca/efp\\_tomato/cgi-bin/efpWeb.cgi](http://bar.utoronto.ca/efp_tomato/cgi-bin/efpWeb.cgi)).  
152 Concert Plant<sup>TM</sup> RNA Reagent (Invitrogen) was used as per manufacturer’s instructions. RNA  
153 was DNase treated and purified using phenol:chloroform purification. cDNA was synthesised  
154 using BioScript<sup>TM</sup> (Bioline). RNA for semi-qRT-PCR was extracted using a Trizol buffer method.  
155 The cDNA for semi-qRT-PCR was synthesised using the Superscript II retrotranscription Kit  
156 (Invitrogen).

157 **Identification and isolation of all members of R2R3 MYB Subgroup 9 family of**  
158 **transcription factors from *Solanum lycopersicum***

159 All members of the R2R3 MYB subgroup 9 family of transcription factors in *Solanum*  
160 *lycopersicum* were identified through a BLAST search (NCBI) for the conserved motif of the  
161 subgroup 9A and 9B transcription factor families. The subgroup membership was also confirmed  
162 by phylogenetic analysis using the phylogeny of (Brockington et al, 2013) as a framework. This  
163 phylogeny was a GARL1 maximum likelihood phylogram of 220 members of the subgroup 9  
164 R2R3 Myb genes and the candidate genes were manually aligned with the phylogram at the level  
165 of amino acids.

166 Gene specific primers were designed to amplify the full length coding sequence of each of the  
167 candidate genes. Primers used can be found in Supplementary Information (supplementary table  
168 ST1). Coding sequences were amplified using Phusion High Fidelity DNA Polymerase. Correct  
169 amplification was confirmed by sequencing with gene specific primers and alignment using  
170 Clustal Omega against the sequenced tomato genome as viewed on Phytozome V12.1 and Sol  
171 Genomics Network (Current Tomato Genome Version SL3.0 and Annotation ITAG3.10).

172 **Tobacco transformation**

173 The coding sequence of each of the R2R3 subgroup 9 genes was cloned into a modified version  
174 of pGreen (Hellens et al, 2000), containing two copies of the CaMV35s promoter and the 35S  
175 terminator to drive constitutive expression in plant tissues.

176 *Nicotiana tabacum* ‘Samsun’ was transformed using a modification of the leaf disk method of  
177 Horsch et al (1985).

178 **Genotyping of transgenic tobacco**

179 PCR with genomic DNA as template used gene specific primers or a gene specific forward  
180 primer with the 35S Reverse Primer (detailed in Supplementary Information). Once presence of  
181 the transgene was confirmed, expression was analysed. RNA was extracted using either a  
182 CTAB-based protocol or Trizol buffer, and was cleaned using a phenol:chloroform purification  
183 before DNase treatment. PCR with RNA template was used to confirm the absence of gDNA  
184 before cDNA synthesis using the Superscript II retrotranscription Kit (Invitrogen). PCR to  
185 confirm expression of the transgene was conducted using gene specific primers, with ubiquitin  
186 primers as a positive control and WT tobacco gDNA as a negative control.

187 **Phenotyping of transgenic tobacco**

188 A minimum of five transgenic lines per construct, all shown to be expressing the transgene, were  
189 analysed.

190 Characterisation of transgenic line phenotypes was conducted using the Keyence light  
191 microscope VHX-5000 and the Zeiss EVO HD15 cryo-scanning Electron Microscope. For SEM  
192 tissue was mounted using a mix of colloidal graphite (G303, Agar Scientific.ltd. unit 7) and  
193 O.C.T compound (Scigen Tissue-Plus®, O.C.T. Scigen Scientific Gardena, LA90248USA). This  
194 glue was mixed in a ratio of 1/3 colloidal graphite to 2/3 O.C.T. The samples were cryogenically  
195 frozen and then underwent a sublimation of 5-9 minutes at -90°C. They were sputter coated with  
196 5nm of platinum.

## 197 **Gene expression analysis**

198 Floral stages for gene expression analysis were determined according to macroscopic features of  
199 organ position and trichome mesh development on the anthers, defined at each stage. Stages of  
200 tomato flower development were imaged using SEM of epoxy resin casts (Green and Linstead,  
201 1990). Three pools of tissue were collected for each stage. Each pool contained multiple  
202 individuals, but approximately the same number of individuals were in each pool. For Stage 1  
203 and Stage 2 the whole bud was collected. For later stages anthers were dissected separately. The  
204 reference gene used for the semi-qRT-PCR was the tomato *CAC* gene (SGN-U314153, Clathrin  
205 adaptor complex Subunit), which has previously been shown to have consistent and stable  
206 expression levels in tomato floral tissue (Expósito-Rodríguez et al, 2008). The reference gene  
207 primers used were those described in (Expósito-Rodríguez et al, 2008). *Myb* gene primers were  
208 tested for specificity against each of the 7 genes cloned into pBLUEscript. 5µl of the PCR  
209 reaction was removed after 30, 35 and 40 cycles and analysed on a 1.5% agarose gel.

210

## 211 **Results**

212 There are seven members of the *R2R3 MYB subgroup 9* family of transcription factors in  
213 *Solanum lycopersicum*

214 A BLAST search of the tomato genome for the diagnostic motif of the MYB subgroup 9  
215 transcription factor family revealed the presence of 7 candidate genes in *Solanum lycopersicum*  
216 (figure 1A). The candidate genes were divided into the subclades 9A and 9B by the presence of a  
217 further diagnostic motif (figure 1Aa). Subgroup membership was also confirmed by phylogenetic  
218 analysis using the phylogeny of Brockington et al, 2013 as a framework. The positions of the 7  
219 tomato genes are shown in figure 1B and supplementary figure S1. Five of the genes fell into  
220 Subgroup 9A, with four of these belonging to the *MIXTA* subclade (*SIMIXTA-1*, *SIMIXTA-2*,  
221 *SIMIXTA-3*, *SIMIXTA-4*) and one belonging to the *MIXTA-like* subclade (*SIMIXTA-like-1*). Two  
222 of the genes belonged to the *MYB17* subclade of subgroup 9B (*SIMYB17-1*, *SIMYB17-2*). No  
223 members of the subclade *MYB17-like* were found in the tomato genome.

224 All of the Subgroup 9A genes induced epidermal outgrowth when expressed ectopically in  
225 tobacco, but by different amounts

226 Five independent lines were analysed for each construct, with transgene expression confirmed by  
227 RT-PCR (Supplementary figure S2; only 4 lines shown for *SIMIXTA-like1*). All of the transgenic  
228 plants had generally normal growth habits, with leaves and flowers of macroscopically wild type  
229 appearance. However, microscopic analysis revealed epidermal outgrowth on a number of  
230 organs. Each of the five Subgroup 9A genes induced outgrowth of epidermal cells when  
231 ectopically expressed in tobacco. Representative SEM images of a single transgenic line per  
232 construct are shown in figure 2, in comparison to wild type tissues (figure 2A-D).

233 Lines ectopically expressing *SIMIXTA-1* had anthers which did not dehisce even when flowers  
234 matured. The transgenic plants had to be pollinated by hand. Examined using cryo-SEM the  
235 entire anther surface was covered in trichome-like epidermal cell outgrowths and conical cells  
236 (figure 2E). Some of these outgrowths were observed to be branched, and some had stomatal  
237 guard cells at the tip of the outgrowth. The epidermal surface of the ovary, usually composed of  
238 flat cells in the wild type, had many trichome-like outgrowths which were more elongated than  
239 those found on the anther surface and were in places multi-lobed (figure 2F). Ectopic conical  
240 cells were observed on the leaf epidermis, particularly on the adaxial side (figure 2G1 and figure  
241 2H1). Ectopic branching trichomes were observed on both the adaxial and abaxial leaf  
242 epidermis (figure 2G2 and figure 2H2).

243 In contrast lines ectopically expressing *SIMIXTA-2* had only a weak epidermal outgrowth  
244 phenotype. The epidermal surface of the anthers had occasional glandular trichomes (figure 2I1).  
245 Non-glandular trichome-like outgrowths were also observed along the anther connective (figure  
246 2I2) and on the side of the anther to a lesser degree. Anthers were able to dehisce and overall  
247 were not dramatically different from WT. The epidermal surface of the ovary was smooth and  
248 resembled WT (figure 2J). The leaves had some branched trichomes on the adaxial side but  
249 otherwise resembled WT (figure 2K1 and 2L1).

250 Lines ectopically expressing *SIMIXTA-3* also showed only a weak epidermal outgrowth  
251 phenotype and largely resembled WT. Glandular trichomes were present on the anther epidermal  
252 surface (figure 2M1) as well as some non-glandular trichomes on the anther connective, however  
253 the anthers dehisced normally (figure 2M). The surface of the ovary contained some cells which  
254 had grown out from the plane of the tissue, but these conical cells were not very pronounced  
255 (figure 2N1). The leaves had branched trichomes, both glandular and non-glandular, on the  
256 adaxial surface (figure 2O1) but the abaxial side of the leaf resembled WT (figure 2P).

257 Lines ectopically expressing *SIMIXTA-4* had a stronger phenotype, similar to those expressing  
258 *SIMIXTA-1*. The general shape of the anther epidermal cells was conical (figure 2Q1). Glandular  
259 trichomes (figure 2Q2), non-glandular trichomes (figure 2Q3) and stomata were also found on  
260 the anther epidermal surface (figure 2Q4). The conical shape of the epidermal cells of the anther  
261 became more pronounced as the anther reached maturity and began to dehisce. Glandular  
262 trichomes were also more exaggerated and numerous on the anther connective. The anthers were  
263 able to dehisce, to a limited extent. Trichomes were also observed on filaments of mature anthers



264 but not on immature anthers. The ovary epidermal cell surface had conical cells (figure 2R1)  
265 towards the base of the ovary and some trichome like outgrowths were also observed (figure  
266 2R2). Branched trichomes were occasionally observed on the leaf epidermal surface on both  
267 sides of the leaf (figure 2S and 2T).

268 Lines ectopically expressing *SIMIXTA-like* had glandular trichomes (figure 2U1), non-glandular  
269 trichomes (figure 2U2) and stomata (figure 2U3) on the anther surface, and the rest of the anther  
270 was covered in ectopic conical cells (figure 2U4). The epidermis of the ovary had conical shaped  
271 cells (figure 2V1), however the phenotype was not as strong as seen with *SIMIXTA-1* and  
272 *SLMIXTA-4*. Occasional conical cells were also seen on the inside of the corolla tube. Branched  
273 trichomes were observed on the abaxial leaf surface (figure 2X1).

274 In summary, ectopic expression of *SIMIXTA-1* and *SIMIXTA-4* induced extensive epidermal cell  
275 outgrowth, *SIMIXTA-like* induced an intermediate phenotype, and *SIMIXTA-2* and *SIMIXTA-3*  
276 induced only weak epidermal outgrowth.

277 Both of the Subgroup 9B genes induced extensive epidermal outgrowth when expressed  
278 ectopically in tobacco

279 Five independent lines were analysed for each construct, with transgene expression confirmed by  
280 RT-PCR (Figure S3). All of the transgenic plants had generally normal growth habits, with  
281 leaves and flowers of macroscopically wild type appearance. Representative SEM images of a  
282 single transgenic line per construct are shown in figure 3, in comparison to the same wild type  
283 tissues shown in figure 2 (figure 3A-E). Both of the Subgroup 9B genes induced extensive  
284 outgrowth of epidermal cells when ectopically expressed in tobacco, producing very strong  
285 phenotypes.

286 Lines ectopically expressing *SIMYB17-1* had a very strong anther phenotype. The anthers were  
287 unable to dehisce and the plants had to be hand pollinated. The anther epidermis was entirely  
288 converted to trichomes (figure 3F1) and conical cells (figure 3F2), most exaggerated at the  
289 anther connective (figure 3F). These outgrowths were also present on the filament. Some of the  
290 trichomes had stomata on the tip (figure 3F3). The epidermal surface of the ovary had trichome-  
291 like outgrowths with a mix of long and short trichomes (figure 3G1) and some of the outgrowths  
292 were multi-lobed (figure 3G2).). The adaxial side of the leaf had branching trichomes (figure  
293 3H1) and some of the epidermal surface cells had conical outgrowths (figure 3H2). The abaxial  
294 surface of the leaves had large numbers of branched trichomes and many conical cells (figure  
295 3I1). The normally flat inner corolla tube had conical cells and occasionally longer trichomes  
296 (Figure 3J1).

297 Lines ectopically expressing *SIMYB17-2* also had anthers which were unable to dehisce, and had  
298 to be hand pollinated. The anthers were completely covered in epidermal cell outgrowths both in  
299 the form of trichomes and conical cells (figure 3K). Sometimes stomata were on the end of these  
300 trichomes (figure 3K1). Longer glandular trichomes were also sometimes observed at the anther

301 connective. The anther filaments also had trichomes on the surface. The epidermal surface of the  
302 ovary was entirely composed of cellular outgrowths which were most exaggerated at the base of  
303 the ovary (figure 3L). Branched trichomes were seen on the adaxial leaf surface (figure 3M1).  
304 Conical cells were seen on the abaxial surface on and around the leaf vein (figure 3N). Some  
305 conical cells (figure 3O1) were observed on the inside of the corolla tube along with some  
306 trichomes (figure 3O2).

#### 307 The anther trichome mesh develops at an intermediate stage of bud development

308 To assess the timing of anther trichome development we divided tomato flower development into  
309 7 stages, mainly determined by the relative position of the calyx and the corolla (figure 4A).  
310 Scanning electron microscopy revealed that the anther trichomes appear first as outgrowths in  
311 stage 2 (4B2 I), expanding in stage 3 and knitting the anthers together by late stage 3 (figure 4B3  
312 II). Later in flower development additional cellular outgrowth is observed on the anther  
313 epidermis, with multilobed cells appearing at stage 4 (figure 4B 4III).

#### 314 Several of the *Subgroup 9 Myb* genes are expressed during early stages of tomato flower 315 development

316 The tomato eFP browser [http://bar.utoronto.ca/efp\\_tomato/cgi-bin/efpWeb.cgi](http://bar.utoronto.ca/efp_tomato/cgi-bin/efpWeb.cgi) gave an  
317 indication of which tissues the candidate genes were expressed in, and of the levels of  
318 expression. These data are summarised in table 1. Since a number of the genes appear to be  
319 expressed during flower development, we used semiquantitative RT-PCR to explore the timing  
320 of expression in floral tissues relative to the development of the anther trichome mesh (figure 5).

321 Expression was explored in whole floral bud at stage 1 (before anther trichomes emerge) and  
322 stage 2 (the earliest stage of anther trichome development), and in dissected anthers at stage 3  
323 (when the trichome mesh is knitting together) and stage 4.

324 *SIMIXTA-1* was expressed in the early stages of the bud development. Bands were visible in  
325 stage 1 and stage 2, most strongly in stage 1 with the expression fading as the bud developed:  
326 only a very faint band was visible in stage 4 at cycle 40. *SIMIXTA-2* was not expressed in the  
327 floral tissues examined, or expressed at such a low level that it was not detectable, as predicted  
328 by the tomato eFP browser. *SIMIXTA-3* was expressed only at a low level in all four of the floral  
329 stages. *SIMIXTA-4* also had only very low level expression visible only after 40 cycles for each  
330 of the tissues. *SIMIXTA-like-1* appeared to not be expressed in the floral stages examined, or only  
331 expressed at low levels. A band was visible only at cycle 40 and only very faintly in all tissues  
332 examined (a little stronger in bud stage 2). The *SIMYB17-1* gene was expressed most strongly in  
333 the early stages of the development of the bud and during the stages in which the anther trichome  
334 mesh was developing. The gene was expressed in the floral tissue stages 1 and 2 (especially  
335 strongly compared to the reference gene in stage 2), after which expression level dropped. By  
336 stage 4 the band was very faint and only visible after 40 cycles. The *SIMYB17-2* gene was  
337 expressed in all floral stages studied, but was expressed most strongly in early stages of bud

338 development: the brightest bands were observed in stage 1 and especially 2 compared with the  
339 housekeeping gene. This was an almost identical expression pattern to that observed for  
340 *SIMYB17-1*.

341 Since stage 1 and 2 samples contained entire bud tissue, while stage 3 and 4 samples only  
342 contained anthers, any expression observed in stages 1 and 2 may not only arise from anther  
343 trichome development but might also reflect activity in the petals or sepals.

## 344 Discussion

345 The R2R3 Myb subgroup 9 family of transcription factors of *Solanum lycopersicum* were shown  
346 to various degrees to be capable of inducing outgrowth of cells when they were ectopically  
347 expressed in tobacco. This indicates that all these proteins have the potential to initiate epidermal  
348 cell outgrowths such as conical cells and trichomes within *Solanum lycopersicum*. However, the  
349 degree to which epidermal cell outgrowths were induced, and the number of tissues in which  
350 they were observed to act, varied from gene to gene.

351 The range of phenotypes exhibited in this study was similar to that reported in the set of studies  
352 in which the R2R3 subgroup 9A genes of *Antirrhinum majus* (*A. majus*) were ectopically  
353 expressed in tobacco (Glover et al, 1998; Perez-Rodriguez et al, 2005; Baumann et al, 2007;  
354 Jaffe et al, 2007). The strongest phenotype in those previous studies was observed in tobacco  
355 lines containing ectopically expressed *AmMIXTA* (Glover et al, 1998). In these lines trichomes  
356 were observed covering most tissues and with a particularly large amount of epidermal cell  
357 outgrowth observed on the ovary. These outgrowths included branched and glandular trichomes  
358 on the ovary and the production of conical cell protrusions on the epidermis on both sides of the  
359 leaf. None of the R2R3 subgroup 9 genes of *Solanum lycopersicum* produced phenotypes quite  
360 as extreme as this when ectopically expressed in tobacco. The strongest phenotypes were those  
361 seen in lines expressing the two subgroup 9B genes *SIMyb17-1* and *SIMyb17-2*. These  
362 phenotypes were reminiscent of that of tobacco expressing *AmMIXTA* (a subgroup 9A gene). The  
363 majority of tissues exhibited epidermal cell outgrowths not found in the WT, with the ovary and  
364 the anthers particularly covered in trichomes of various types. However, no branched trichomes  
365 were found on the surface of the ovary, although the trichomes also sometimes had stomata on  
366 the end. Our sqRT-PCR analysed revealed that these two genes had nearly identical expression  
367 patterns in the tomato flower, with particularly strong expression at early stages of development,  
368 when the trichome mesh is beginning to form. This contradicts the eFP browser, which predicted  
369 that *SIMyb17-1* would not be expressed in the flower but that *SIMyb17-2* would.

370 The outgrowths on the ovary of the transgenic lines expressing *SIMyb17-1* resembled the ‘glove-  
371 like’ papillae found on the surface of the tomato anther (figure 4B). Meanwhile, the outgrowths  
372 on the anther of these lines were very like the trichomes which make up the trichome mesh of  
373 WT tomato anthers. In combination with its expression profile in developing flowers (and  
374 persisting in later stages of anther development) this gene is a good candidate for the control of

375 the development of the trichome mesh and/or ‘glove-like’ papillae on the anther surface. The  
376 transgenic lines expressing *SIMyb17-2* also developed trichomes on the anthers and ovary that  
377 resembled those of the trichome mesh. The two *SIMyb-17* genes could be considered likely  
378 candidates for the control of the development of the trichome mesh. They were both expressed  
379 most strongly in tissue stages 1 and 2, where the trichome mesh is developing. It is possible that  
380 the two genes function together or are redundant with one another. Previously studied members  
381 of the *MYB17* clade of genes in subgroup 9B have not shown an involvement in epidermal cell  
382 outgrowth. *AtMYB17* (Pastore et al, 2011) has been shown to be involved in flowering  
383 commitment, but no epidermal phenotype was seen in a mutant line. The gene was also shown to  
384 be involved in the regulation of activity of *APETALA1* in the flowers of *Arabidopsis thaliana*  
385 and is thought to act together with *LEAFY* (Zhang et al, 2009). However it has been previously  
386 argued that with so much paralogy in the *MYB subgroup 9* lineages it is possible that the  
387 *AtMYB17* gene of *Arabidopsis thaliana* may have acquired a different role to other *MYB17*  
388 representatives and that a possible role of *MYB17* genes in the regulation of epidermal cell  
389 outgrowths should not be dismissed entirely (Brockington et al, 2013). Brockington et al (2013)  
390 also implicated the *MYB17* lineage genes in epidermal outgrowth regulation because the  
391 *Nicotiana* EST-derived fragments nested within the *MYB17* clade in their phylogenetic analysis  
392 were derived from trichome-specific transcriptomes.

393 A *MYB17-like* gene (*LjMYB17-like*) from *Lotus japonicus* was analysed by Brockington et al  
394 (2013) and, when ectopically expressed in tobacco, produced a very strong phenotypic effect.  
395 The epidermal cells on the adaxial and abaxial leaf surfaces became conical in shape and there  
396 was a reduced number of stomata. The filament of the stamen also gained trichomes and conical  
397 cells on its epidermal surface. The ovary surface was covered in long conical cells and the cells  
398 on the petal lobes had become elongated and glandular trichomes were also found (Brockington  
399 et al, 2013). No member of the *MYB17-like* clade was present in the tomato genome, but this  
400 previous study supports a role for *subgroup 9B* genes more generally in epidermal cell  
401 outgrowth.

402 The *A. majus* subgroup 9 gene with the second strongest phenotype when expressed in tobacco  
403 was *AmMYBML-1*, another gene in the *MIXTA* clade (Perez-Rodriguez et al, 2005). The anthers  
404 of these lines were covered in conical cells and failed to dehisce as a result. The ovary surface  
405 was covered in a mixture of conical cells and trichomes. However the epidermal surface of the  
406 leaves was considered to be WT in appearance. The phenotype of lines expressing *SIMIXTA-1*  
407 was reminiscent of this and could be considered the third strongest phenotype observed in this  
408 study. A mixture of conical cells and trichomes were observed on the ovary surface and  
409 trichomes were also found on the anther surface and consequently the anthers did not dehisce.  
410 Branched trichomes were also observed on the leaf surface and occasional conical protrusions on  
411 the leaf surface, however in general the phenotype was weaker than that observed in *AmMIXTA*  
412 lines and closer in resemblance to those of *AmMYBML-1*.

413 The *SIMIXTA-4* lines were also reminiscent in phenotype of the *AmMYBML-1* study. However  
414 the phenotype was less strong than observed in *SIMIXTA-1* lines. The ovary still exhibited both  
415 conical cells and trichomes, but the proportion of conical cells relative to trichomes was  
416 increased. The number of trichome outgrowths observed on the anther surface was less than that  
417 observed in *SIMIXTA-1* lines and the anthers were able to dehisce as a result of only slightly  
418 conical shaped cells and some glandular trichomes rather than large numbers of simple trichome-  
419 like outgrowths. The leaves resembled WT tobacco.

420 Both the *SIMIXTA-1* and the *SIMIXTA-4* genes were expressed in developing flowers, but  
421 *SIMIXTA-1* was expressed slightly more strongly in the early stages of development, while  
422 *SIMIXTA-4* was expressed more strongly in later stages. This temporal separation of expression  
423 patterns could indicate differential roles in flower development, with *SIMIXTA-4* potentially  
424 involved in later stage developmental processes such as the development of the glove-like  
425 papillae on the anthers.

426 The weakest phenotypes observed in this were those produced by ectopically expressing  
427 *SIMIXTA-2* and *SIMIXTA-3*, which resulted in an even weaker phenotype than the weakest of the  
428 phenotypes obtained from expression of *A. majus* genes. Lines expressing *SIMIXTA-2* and *SI-*  
429 *MIXTA-3* had a few branched trichomes on the leaf epidermis, and a few shallow conical cells on  
430 the ovary surface, similar to those found when expressing *AmMYBML3* (Jaffe et al, 2007). The  
431 lack of expression of *SIMIXTA-2* and *SI-MIXTA-3* in floral tissues suggests that these genes do  
432 not play a role in anther trichome mesh regulation. In a previous study of *SIMIXTA-3* (*SIMX1*) it  
433 was shown that when over-expressed in tomato there was increased resistance to drought (Ewas  
434 et al, 2016). SEM images in that study showed increased numbers of trichomes on the leaves and  
435 stems of tomato lines overexpressing *SIMIXTA-3* as well as increased leaf thickness. RNAi lines  
436 with downregulation of *SIMIXTA-3* expression showed the opposite (Ewas et al, 2016).

437 The *A.majus* genes belonging to the *MIXTA-like* clade of Brockington et al (2013) (*AmMYBML2*  
438 and *AmMYBML3*) had the weakest phenotypes when expressed in tobacco (Baumann et al, 2007;  
439 Jaffe et al, 2007). The *MIXTA-like* genes from *Arabidopsis thaliana* (*AtMYB16*) and *Petunia*  
440 *hybrida* (*PhMYB1*) produced near identical phenotypes to that produced by ectopic expression of  
441 *AmMYBML2* (Baumann et al, 2007), with some conical cells on the ovary epidermis and an  
442 extension of the petal conical cells. The *TtMYBML2* gene of *Thalictrum thalictroides* also  
443 induces conical cells on the ovary and carpel and elongates those of the petal lobe (Di Stilio et al,  
444 2009). The lines expressing *SIMIXTA-like-1* in this study were reminiscent of this phenotype, yet  
445 slightly stronger. The ovary surface exhibited only conical cells and no trichomes, like the  
446 *AmMYBML2* and *AmMYBML3* phenotypes, yet conical cell-like protrusions were also observed  
447 on the anther surface (although they did not affect dehiscence). The conical cells on the petal  
448 lobe, where conical cells are observed in WT tobacco, also appeared longer in the *SIMIXTA-like*  
449 *1* expressing lines. The *SIMIXTA-like 1* gene was found not to be expressed in flowers,  
450 suggesting no role in anther trichome development. *SIMIXTA-like-1* has been previously studied  
451 and shown to be expressed significantly during tomato fruit development in both skin and flesh

452 tissues (Lashbrooke et al, 2015, where it was referred to as *SMixta-like*). It was also shown that  
453 RNAi lines in which the gene was silenced in tomato resulted in the flattening of epidermal cells  
454 and thinning of the cuticle in tomato fruit (Lashbrooke et al, 2015), so it is possible that the gene  
455 is involved in epidermal cell outgrowths in other surfaces in addition to fruit cuticle. *SIMIXTA-*  
456 *like-1* has since been shown using CRISPR Cas9 knockout to be a negative regulator of trichome  
457 development in leaves (Galdon-Armero et al, 2020) but to be a positive regulator of conical cell  
458 outgrowths in petals and fruit, therefore serving different outgrowth regulatory purposes in  
459 different tissues (Galdon-Armero et al, 2020).

460 Transgenic experiments using a heterologous host must always be interpreted with caution. In  
461 this study we have not demonstrated that a particular gene performs a particular function,  
462 because we have not worked in the endogenous host. However, by expressing the 7 members of  
463 this subfamily from the same promoter in tobacco under the same conditions we can draw  
464 conclusions about the relative ability of each protein to induce cellular outgrowth. This study  
465 presents the first analysis of the complete set of MYB subgroup 9 transcription factors in a single  
466 species.

467

468 **Supplementary Figures:**

469 **Figure S1: Phylogenetic analysis of R2R3 MYB subgroup 9 genes (with the position of**  
470 **tomato genes included).**

471 **Figure S2: Analysis of expression of *subgroup 9A* genes in transgenic tobacco lines.**

472 **Figure S3: Analysis of expression of *subgroup 9B* genes in transgenic tobacco lines.**

473 **ST1: Table of primers used.**

474

475 **Acknowledgements**

476 We thank Matthew Dorling for excellent care of plants, Sam Brockington for help with  
477 phylogenetic analysis, and members of the Glover lab for helpful discussions. GVD was  
478 supported by the Natural Environment Research Council (grant number NE/L002507/1).

479

480 **Author contributions :**

481 BJB conceived of the idea and supervised the project. BJB and GVD designed the experiments  
482 and developed the idea. GVD performed the experiments. GVD and BJB wrote the manuscript.  
483 The manuscript was edited by GVD and BJB

484

485 **Data availability statement:**

486 The data supporting the findings of this study are available from the corresponding author,  
487 (Beverley Glover), upon request.

488

## References:

**Alcorn K, Whitney H, Glover B.** 2012. Flower movement increases pollinator preference for flowers with better grip. *Functional. Ecology.* 26,4,941-947.

**Alcorn K.** 2013. Pollinator behaviour and the evolutionary genetics of petal surface texture in the Solanaceae. PhD Thesis, University of Cambridge.

**Antonious GF.** 2001. Production and quantification of methyl ketones in wild tomato accessions. *Journal of Environmental Science and Health Part B.* 36,835–848.

**Baumann K, Perez-Rodriguez M, Bradley D et al.** 2007. Control of cell and petal morphogenesis by R2R3 MYB transcription factors. *Development,* 134 ,9, 1691-1701.

**Brockington SF, Alvarez-Fernandez R, Landis JB et al.** 2013. Evolutionary Analysis of the MIXTA Gene Family Highlights Potential Targets for the Study of Cellular Differentiation. *Molecular Biology and Evolution* , 30,3, 526-540.

**Dubos C, Stracke R, Grotewold, R et al.** 2010. MYB transcription factors in Arabidopsis. *Trends in Plant Science* ,. 15, 10, 573-581.

**Ewas M, Gao Y, Wang S, Liu X, Zhang H, Nishawy EME, Ali F, Shahzad R, Ziaf K, Subthain H, Martin C, Luo J.** 2016. Manipulation of SIMX1 for enhanced carotenoids accumulation and drought resistance in tomato. *Science Bulletin.* 61,18,, pp.1413–1418.

**Exposito-Rodriguez M, Borges AA, Borges-Perez A and Perez JA.** 2008. Selection of internal control genes for quantitative real-time RT-PCR studies during tomato development process. *BMC Plant Biology,* 8, 131.

**Galdon-Armero J, Arce-Rodriguez L, Downie M Li J, Martin C.** 2020. A Scanning Electron Micrograph-based Resource for Identification of Loci Involved in Epidermal Development in Tomato: Elucidation of a New Function for the Mixta-like Transcription Factor in Leaves. *Plant Cell Advance Publication.* 10.1105/tpc.20.00127.

**Glover BJ, Perez-Rodriguez M, Martin C.** 1998. Development of several epidermal cell types can be specified by the same MYB-related plant transcription factor. *Development,* 125 3497-3508.

**Glover BJ, Bunnewell S, Martin C.** 2004. Convergent evolution within the genus Solanum: The specialised anther cone develops through alternative pathways. *Gene,* 331,1-2, 1-7.



**Hellens RP, Edwards EA, Leyland NR et al.** 2000. pGreen: a versatile and flexible binary Ti vector for Agrobacterium-mediated plant transformation. *Plant Molecular Biology*, 42,6,819-832.

**Jin H, Martin C.** 1999. Multifunctionality and diversity within the plant MYB-gene family. *Plant Molecular Biology*, 577-585.

**Kariyat RR, Smith JD, Stephenson AG et al.** 2017. Non-glandular trichomes of *Solanum carolinense* deter feeding by *Manduca sexta* caterpillars and cause damage to the gut peritrophic matrix. *Proceedings of The Royal Society B Biological Sciences*, 284,1849.

**Kay Q, O N, Daoud HS, and Stirton C. H.** 1981. Pigment distribution, light reflection and cell structure in petals. *Botanical Journal of the Linnean Society* ., 83, 57-84.

**Kennedy GG.** 2003. Tomato, pests, parasitoids, and predators: Tritrophic interactions involving the genus *Lycopersicon*. *Annual Review of Entomology*, 48: 51–72.

**Kranz HD, Denekamp M, Greco R et al.** 1998. Towards functional characterisation of the members of the R2R3-MYB gene family from *Arabidopsis thaliana*. *The Plant Journal*, 16May, 263-276.

**Lashbrooke JG, Adato A, Lotan O, Alkan N, Tsimbalist T, Rechav K, Fernandez-Moreno JP, Widemann E, Grausem B, Pinot F, Granell A, Costa F, Aharoni A.** 2015. The Tomato MIXTA-like Transcription Factor Coordinates Fruit Epidermis Conical Cell Development and Cuticular Lipid Biosynthesis and Assembly. *Plant Physiology*, 169(December), p.pp.01145. 2015. Available at: <http://www.plantphysiol.org/lookup/doi/10.1104/pp.15.01145>.

**Levin DA.** 1973. The Role of Trichomes in Plant Defence. *The Quarterly Review of Biology* . 48,1, Part 1, 3-15.

**Luckwill LC** .1943. The genus *Lycopersicon*: a historical, biological and taxonomic survey of the wild and cultivated tomato. *Aberdeen University Studies*, 120: 1– 44.

**Machado A, Wu Y, Yang Youming et al.** 2009. The MYB transcription factor GhMYB25 regulates early fibre and trichome development. *Plant Journal*, 59 52-62.

**Martin C, Bhatt K, Baumann K et al.** 2002. The mechanics of cell fate determination in petals. *Philosophical Transactions of the Royal Society B*, (May) 809-813.

**Martin C, Paz-Ares J.** 1997. MYB transcription factors in plants. *Trends in genetics*. 13. (2). 67-73.

**Martin C, Glover BJ.** 2007. Functional aspects of cell patterning in aerial epidermis. *Current Opinion in Plant Biology*, 10 70-82.

- Meese E, Meltzer PS, Witkowski CM, Trent JM.** 1989. Molecular mapping of the oncogene MYB and rearrangements in malignant melanoma. *Genes Chromosomes Cancer*. 1989 Sep;1(1):88-94.
- Noda K, Glover BJ, Linstead P et al.** 1994. Flower colour intensity depends on specialized cell shape controlled by aMyb-related transcription factor. *Nature* 369 (6482) 661-664.
- Pastore JJ, Limpuangthip A, Yamaguchi N et al.** 2011 LATE MERISTEM IDENTITY2 acts together with LEAFY to activate APETALA1. *Development*, 138, 15, 3189-3198.
- Perez-Rodriguez M, Jaffe FW, Butelli Eugenio et al.** 2005, Development of three different cell types is associated with the activity of a specific MYB transcription factor in the ventral petal of *Antirrhinum majus* flowers. *Development*, 132 ,2, 359-370.
- Pollard AH, Briggs D.** 1984. Genecological studies of *Urtica dioica*.L. III. Stinging hairs and plant-herbivore interactions. *New Phytologist*, 97, 507—522.
- Schillmiller AL, Last R.L, Pichersky E.** 2008. Harnessing plant trichome biochemistry for the production of useful compounds. *The Plant Journal*, 54, 4, 702-711.
- Simmons AT, Gurr GM .**2005. Trichomes of *Lycopersicon* species and their hybrids: effects on pests and natural enemies. *Agricultural and Forest Entomology*, 7: 265–276.
- Stracke R, Werber M, Weisshaar B.** 2001. The R2R3-MYB gene family in *Arabidopsis thaliana*. *Current Opinion in Plant Biology*, 4 ,5, 447-56.
- Tattersall A, Glover BJ, Jaffe FW.** 2007. A truncated MYB transcription factor from *Antirrhinum majus* regulates epidermal cell outgrowth. *Journal of Experimental Botany*, 58 ,6,1515-1524.
- Thurston R.** 1970. Toxicity of Trichome Exudates of *Nicotiana* and *Petunia* Species to Tobacco Hornworm Larvae. *Journal of Economic Entomology*, 63 ,11, 272-274.
- Uphof JCT.** 1962. Plant hairs. *Handb. der Pflanz. Anat.* 4.
- Wagner GJ, Wang E, Shepherd RW.** 2004. New approaches for studying and exploiting an old protuberance, the plant trichome. *Ann. Bot.* 93 ,1, 3-11.
- Walford S, Wu Y, Llewellyn DJ et al.** 2011. GhMYB25-like : a key factor in early cotton fibre development. *The Plant Journal*, 65, 785-797.
- Whitney HM, Chittka L, Bruce TJA et al.** 2009. Report Conical Epidermal Cells Allow Bees to Grip Flowers and Increase Foraging Efficiency. *Current Biology*, 19 ,11, 948-953.

**Zhang Y, Cao G, Qu L, Gu H.** 2009. Characterization of Arabidopsis MYB transcription factor gene AtMYB17 and its possible regulation by LEAFY and AGL15. *Journal of Genetics and Genomics*. 36,2, 99-107.

## Tables

**Table 1: A table summarising the expression of the R2R3 MYB subgroup 9 candidate genes in *Solanum lycopersicum*.**

This table summarises expression levels predicted by the eFP browser for the candidate genes.

## Figures

**Figure 1A: Cartoon of the proteins of the R2R3 MYB subgroup 9 genes of *Solanum lycopersicum*, with key motifs labelled.**

Sol genomics codes are displayed beneath name the transcription factor is referred to within this paper. Lengths displayed are total amino acids.

**Figure 1B: Cartoon phylogeny of the R2R3 MYB Subgroup 9 family of transcription factors.**

Based on reconstruction by Brockington et al 2013. Placement of R2R3 subgroup 9 transcription factors within tomato is indicated.

**Figure 2: SEM images of key tissues of transgenic tobacco ectopically expressing the *Solanum lycopersicum* subgroup 9A genes.**

The images shown are representative individuals of each line, from which a minimum of 5 individuals were examined per line. Wild-type tobacco tissues are shown as comparison. The tissues shown are anther surface and ovary surface as these tissues showed the most distinctive transgenic phenotypes and showed the most variation with expression of the different genes. A: WT tobacco anther, B: WT ovary epidermal surface. C: WT adaxial leaf surface. D: WT abaxial leaf surface. E: Anther surface of tobacco ectopically expressing *SIMIXTA-1*. F: Ovary surface of tobacco ectopically expressing *SIMIXTA-1*. G: Adaxial leaf surface of tobacco ectopically expressing *SIMIXTA-1*, G1 labels ectopic conical cells, G2 labels ectopic branched trichome. H: Abaxial leaf surface of tobacco ectopically expressing *SIMIXTA-1*, H1 labels ectopic conical cells, H2 labels ectopic branched trichome. I: Anther surface of tobacco ectopically expressing *SIMIXTA-2*, I1 labels ectopic glandular trichome, I2 labels ectopic non-glandular trichome. J: Ovary surface of tobacco ectopically expressing *SIMIXTA-2*. K: Adaxial leaf surface of tobacco ectopically expressing *SIMIXTA-2*, K1 labels ectopic branched trichome. L: Abaxial leaf surface of tobacco ectopically expressing *SIMIXTA-2*, L1 labels ectopic branched trichome. M: Anther surface of tobacco ectopically expressing *SIMIXTA-3*, M1 labels ectopic glandular trichome. N:

Ovary surface of tobacco ectopically expressing *SIMIXTA-3*, N1 labels ectopic conical cells. O: Adaxial leaf surface of tobacco ectopically expressing *SIMIXTA-3*, O1 labels ectopic branched trichome. P: Abaxial leaf surface of tobacco ectopically expressing *SIMIXTA-3*. Q: Anther surface of tobacco ectopically expressing *SIMIXTA-4*, Q1 labels ectopic conical cells, Q2 labels ectopic guard cells, Q3 labels ectopic non-glandular trichome, Q4 labels ectopic glandular trichome. R: Ovary surface of tobacco ectopically expressing *SIMIXTA-4*, R1 labels ectopic conical cells, R2 labels ectopic non-glandular trichome. S: Adaxial leaf surface of tobacco ectopically expressing *SIMIXTA-4*. T: Abaxial leaf surface of tobacco ectopically expressing *SIMIXTA-4*. U Anther surface of tobacco ectopically expressing *SIMIXTA-like-1*, U1 labels ectopic glandular trichome, U2 labels ectopic non-glandular trichome, U3 labels ectopic guard cell, U4 labels ectopic conical cell. V: Ovary surface of tobacco ectopically expressing *SIMIXTA-like-1*, V1 labels ectopic conical cell. W: Adaxial leaf surface of tobacco ectopically expressing *SIMIXTA-like-1*. X: Abaxial leaf surface of tobacco ectopically expressing *SIMIXTA-like-1*, X1 labels ectopic branched trichome.

**Figure 3: The transgenic phenotypes of lines of tobacco ectopically expressing each of the *R2R3 MYB subgroup 9B* genes of tomato.**

The images shown are representative individuals of each line, from which a minimum of 5 individuals were examined per line. Wild-type tobacco tissues are shown as comparison. The tissues shown are anther surface and ovary surface as these tissues showed the most distinctive transgenic phenotypes and showed the most variation with expression of the different genes. A: WT tobacco anther. B: WT ovary epidermal surface. C: WT adaxial leaf surface. D: WT abaxial leaf surface. E: WT corolla surface. F: Anther surface of tobacco ectopically expressing *SIMYB17-1*, F1 labels ectopic trichomes, F2 labels ectopic conical cells. G: Ovary surface of tobacco ectopically expressing *SIMYB17-1*, G1 labels ectopic trichome like outgrowths, G2 labels multilobed outgrowths. H: Adaxial leaf surface of tobacco ectopically expressing *SIMYB17-1*, H1 labels ectopic branched trichome, H2 labels ectopic conical cells. I: Abaxial leaf surface of tobacco ectopically expressing *SIMYB17-1*, I1 labels ectopic conical cells. J: Corolla surface of tobacco expressing *SIMYB17-1*, J1 labels ectopic conical cells. K: Anther surface of tobacco ectopically expressing *SIMYB17-2*, K1 labels ectopic guard cells on top of cell outgrowths. L: Ovary surface of tobacco ectopically expressing *SIMYB17-2*. M: Adaxial leaf surface of tobacco expressing *SIMYB17-2*, M1 labels ectopic branched trichome. N: Abaxial leaf surface of tobacco expressing *SIMYB17-2*. O: Corolla surface of tobacco expressing *SIMYB17-2*, O1 labels ectopic conical cells, O2 labels ectopic trichome.

**Figure 4: The stages of floral development and the anther epidermal cell outgrowths of *Solanum lycopersicum*.**

A. Six stages of tomato flower development chosen to reflect the development of the epidermal cell outgrowths on tomato anthers. B. SEM images of anther surface at stages 1 to 4. Epidermal cell outgrowths begin to develop at stage 2 (I). By stage 3 the anther trichome mesh (II) is almost

completely formed and other papillae have begun to form on the anther surface. The papillae on the anther surface take on a distinctive ‘glove-like’ multilobed (III) appearance during stage 4.

**Figure 5: Semi quantitative RT PCR analysis of expression of all *Solanum lycopersicum* R2R3 MYB subgroup 9 genes during development of the flower.**

Stages 1 to 4 are the first 4 developmental stages shown in Figure 4. Flower developmental stages are labelled above each lane, and the number of cycles is indicated. Positive and negative controls were conducted for each primer set (not shown): the positive control was the same primers amplifying from a plasmid containing the sequenced gene, the negative control was the same primers with only water. *SICAC* was used as a reference gene (lower panels)

Table 1

| <b>Gene</b>           | <b>eFP browser prediction</b>                                                |
|-----------------------|------------------------------------------------------------------------------|
| <i>SIMIXTA-1</i>      | Unopened flower buds                                                         |
| <i>SIMIXTA-2</i>      | Leaves                                                                       |
| <i>SIMIXTA-3</i>      | Unopened flower buds                                                         |
| <i>SIMIXTA-4</i>      | Unopened flower buds and mature flowers                                      |
| <i>SIMIXTA-like-1</i> | Unopened flower buds, leaves and fruit                                       |
| <i>SIMYB17-1</i>      | Low levels in green fruit                                                    |
| <i>SIMYB17-2</i>      | Unopened flower buds, mature flowers.<br>Lower expression throughout leaves. |

**Table 1: A table summarising the expression of the R2R3 MYB subgroup 9 candidate genes in *Solanum lycopersicum*.**

This table summarises expression levels predicted by the eFP browser for the candidate genes.

# Figure 1

## 1A

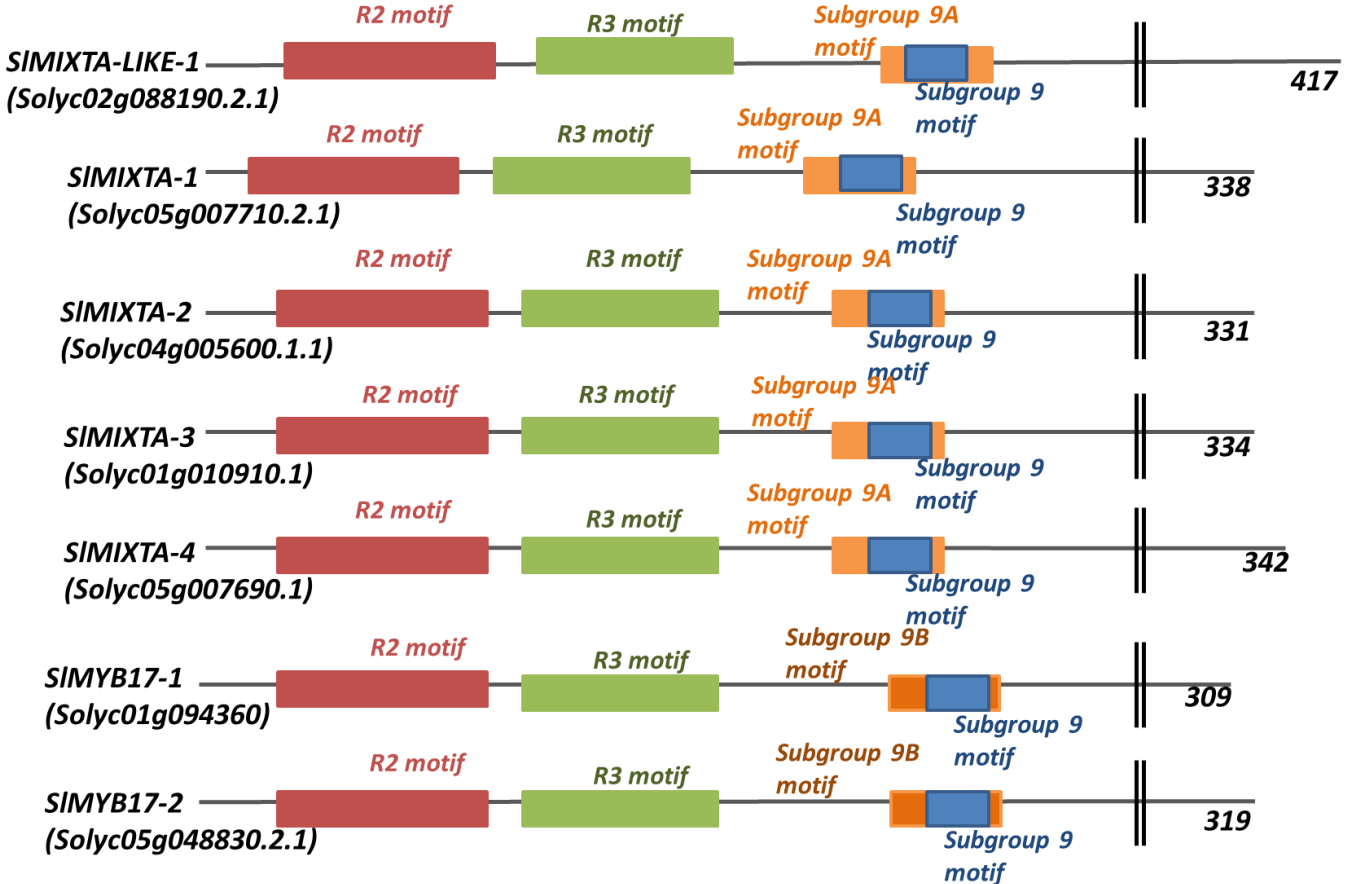

## 1B

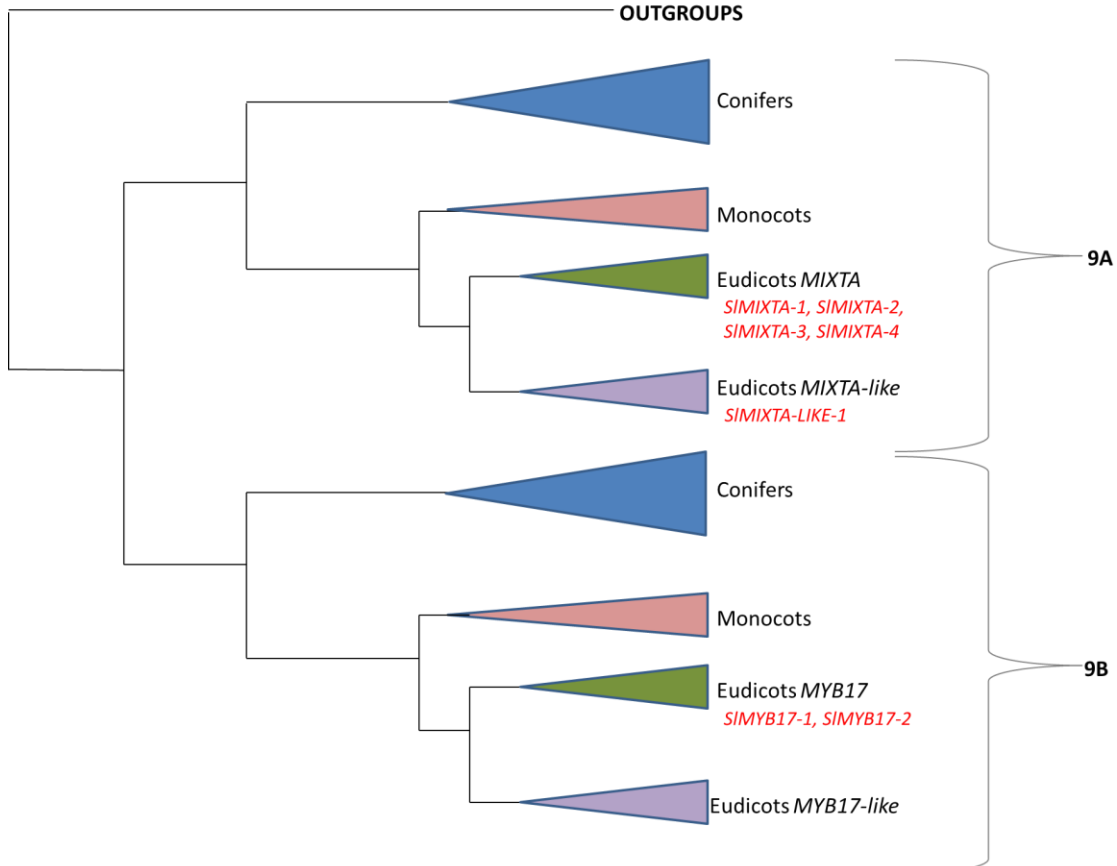

**Figure 1A: Cartoon of the proteins of the R2R3 MYB subgroup 9 genes of *Solanum lycopersicum*, with key motifs labelled.**

Sol genomics codes are displayed beneath name the transcription factor is referred to within this paper. Lengths displayed are total amino acids.

**Figure 1B: Cartoon phylogeny of the R2R3 MYB Subgroup 9 family of transcription factors.**

Based on reconstruction by Brockington et al 2013. Placement of R2R3 subgroup 9 transcription factors within tomato is indicated.



Figure 2

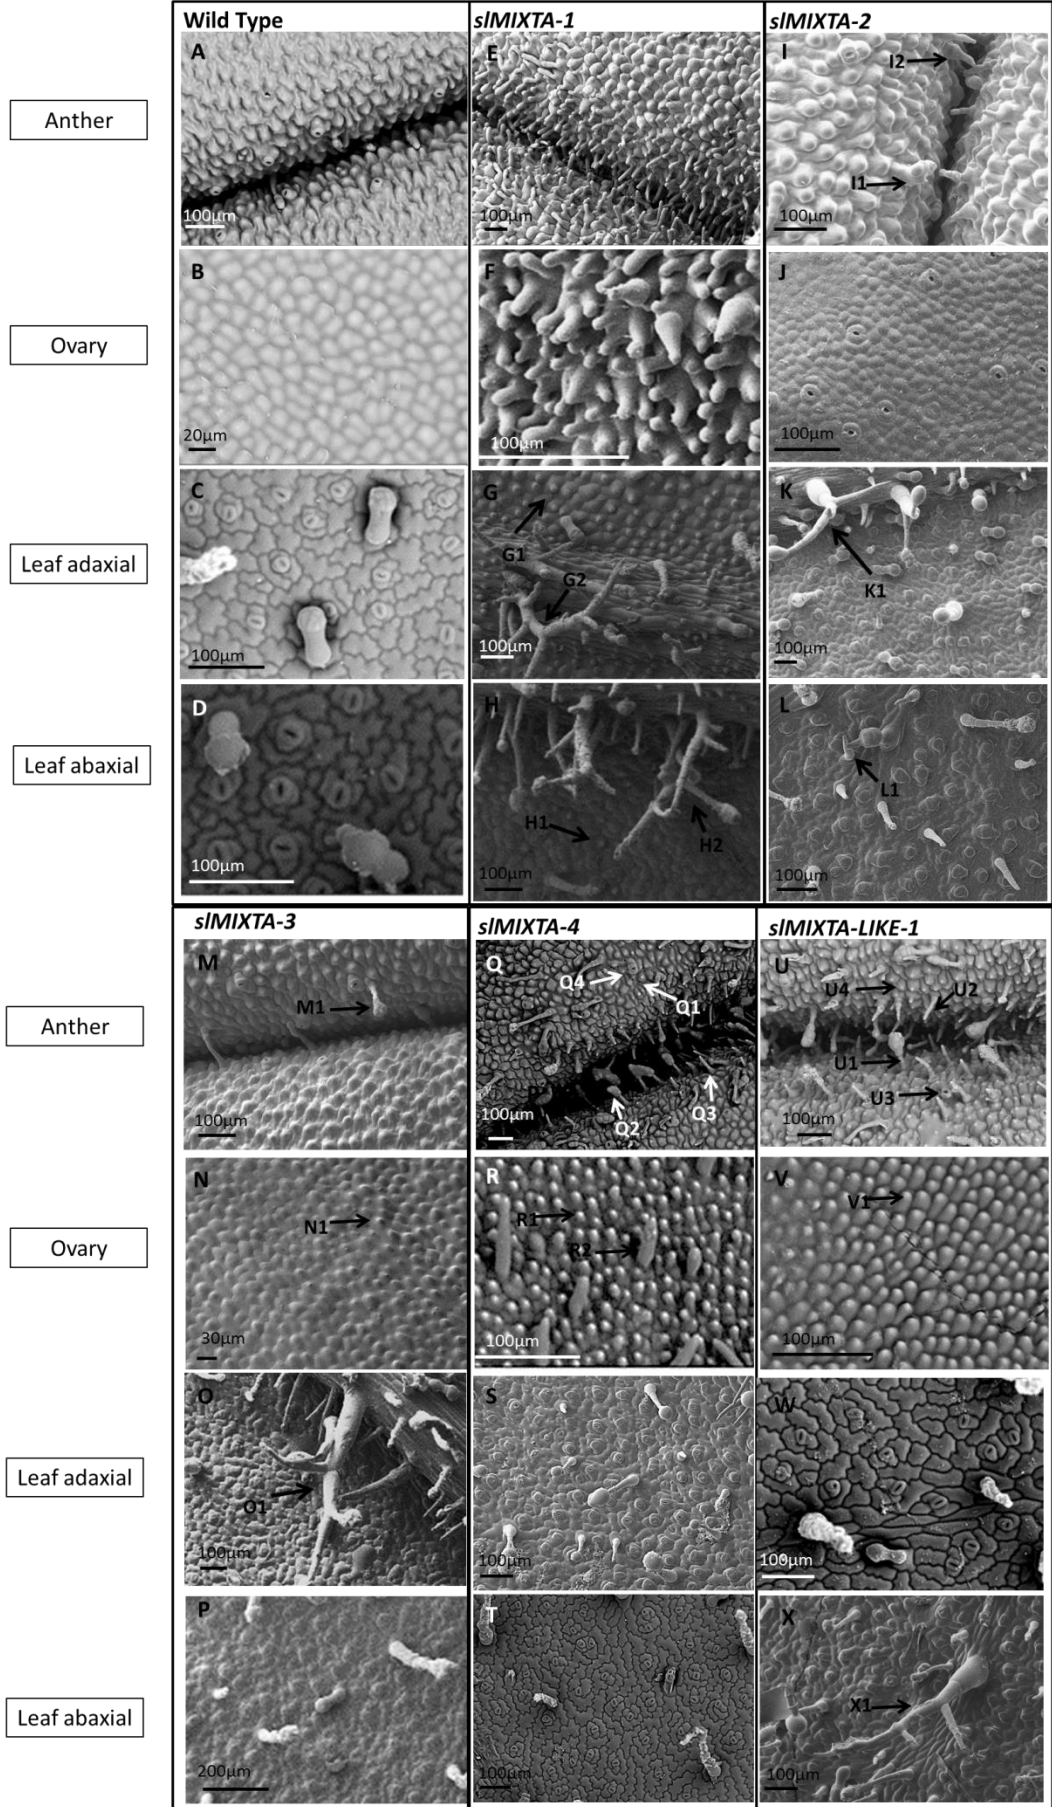

**Figure 2: SEM images of key tissues of transgenic tobacco ectopically expressing the *Solanum lycopersicum* subgroup 9A genes.**

The images shown are representative individuals of each line, from which a minimum of 5 individuals were examined per line. Wild-type tobacco tissues are shown as comparison. The tissues shown are anther surface and ovary surface as these tissues showed the most distinctive transgenic phenotypes and showed the most variation with expression of the different genes. A: WT tobacco anther, B: WT ovary epidermal surface. C: WT adaxial leaf surface. D: WT abaxial leaf surface. E: Anther surface of tobacco ectopically expressing SIMIXTA-1. F: Ovary surface of tobacco ectopically expressing SIMIXTA-1. G: Adaxial leaf surface of tobacco ectopically expressing SIMIXTA-1, G1 labels ectopic conical cells, G2 labels ectopic branched trichome. H: Abaxial leaf surface of tobacco ectopically expressing SIMIXTA-1, H1 labels ectopic conical cells, H2 labels ectopic branched trichome. I: Anther surface of tobacco ectopically expressing SIMIXTA-2, I1 labels ectopic glandular trichome, I2 labels ectopic non-glandular trichome. J: Ovary surface of tobacco ectopically expressing SIMIXTA-2. K: Adaxial leaf surface of tobacco ectopically expressing SIMIXTA-2, K1 labels ectopic branched trichome. L: Abaxial leaf surface of tobacco ectopically expressing SIMIXTA-2, L1 labels ectopic branched trichome. M: Anther surface of tobacco ectopically expressing SIMIXTA-3, M1 labels ectopic glandular trichome. N: Ovary surface of tobacco ectopically expressing SIMIXTA-3, N1 labels ectopic conical cells. O: Adaxial leaf surface of tobacco ectopically expressing SIMIXTA-3, O1 labels ectopic branched trichome. P: Abaxial leaf surface of tobacco ectopically expressing SIMIXTA-3. Q: Anther surface of tobacco ectopically expressing SIMIXTA-4, Q1 labels ectopic conical cells, Q2 labels ectopic guard cells, Q3 labels ectopic non-glandular trichome, Q4 labels ectopic glandular trichome. R: Ovary surface of tobacco ectopically expressing SIMIXTA-4, R1 labels ectopic conical cells, R2 labels ectopic non-glandular trichome. S: Adaxial leaf surface of tobacco ectopically expressing SIMIXTA-4. T: Abaxial leaf surface of tobacco ectopically expressing SIMIXTA-4. U: Anther surface of tobacco ectopically expressing SIMIXTA-like-1, U1 labels ectopic glandular trichome, U2 labels ectopic non-glandular trichome, U3 labels ectopic guard cell, U4 labels ectopic conical cell. V: Ovary surface of tobacco ectopically expressing SIMIXTA-like-1, V1 labels ectopic conical cell. W: Adaxial leaf surface of tobacco ectopically expressing SIMIXTA-like-1. X: Abaxial leaf surface of tobacco ectopically expressing SIMIXTA-like-1, X1 labels ectopic branched trichome.

Figure 3

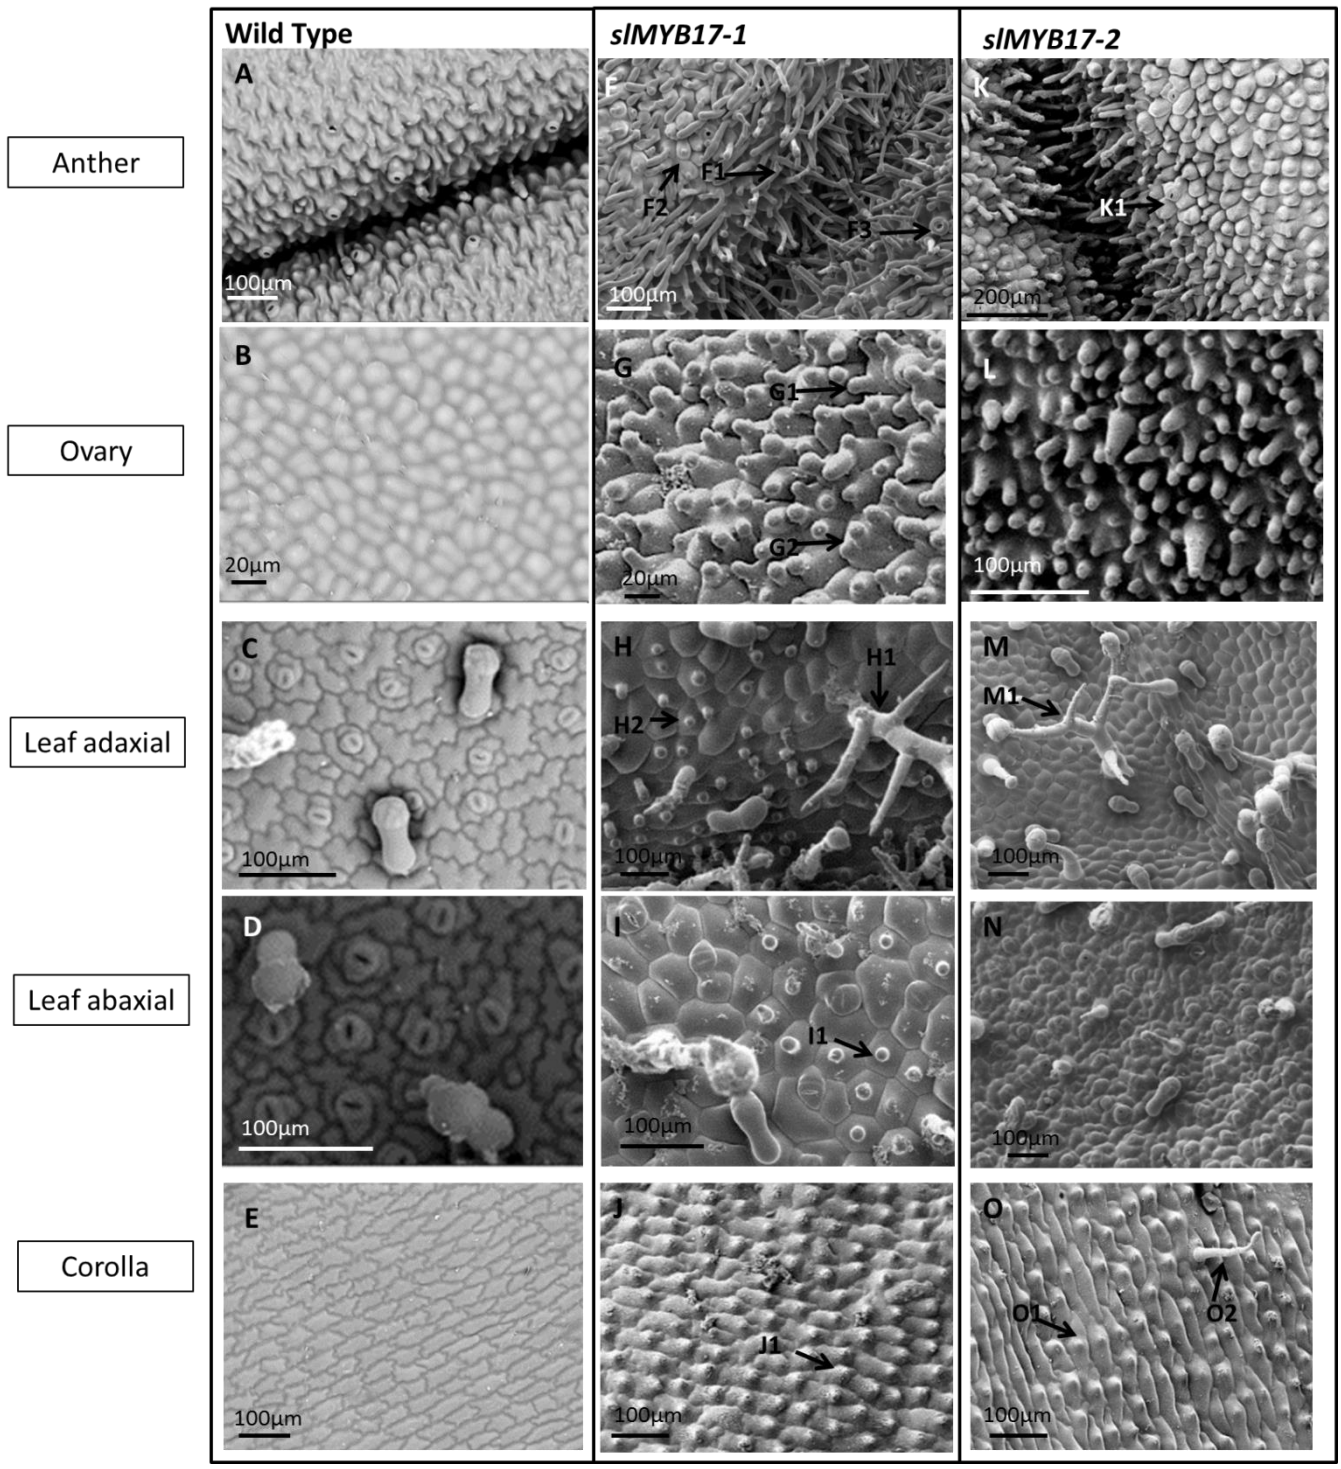

**Figure 3: The transgenic phenotypes of lines of tobacco ectopically expressing each of the R2R3 MYB subgroup 9B genes of tomato.**

The images shown are representative individuals of each line, from which a minimum of 5 individuals were examined per line. Wild-type tobacco tissues are shown as comparison. The tissues shown are anther surface and ovary surface as these tissues showed the most distinctive transgenic phenotypes and showed the most variation with expression of the different genes. A: WT tobacco anther. B: WT ovary epidermal surface. C: WT adaxial leaf surface. D: WT abaxial leaf surface. E: WT corolla surface. F: Anther surface of tobacco ectopically expressing SIMYB17-1, F1 labels ectopic trichomes, F2 labels ectopic conical cells. G: Ovary surface of tobacco ectopically expressing SIMYB17-1, G1 labels ectopic trichome like outgrowths, G2 labels multilobed outgrowths. H: Adaxial leaf surface of tobacco ectopically expressing SIMYB17-1, H1 labels ectopic branched trichome, H2 labels ectopic conical cells. I: Abaxial leaf surface of tobacco ectopically expressing SIMYB17-1, I1 labels ectopic conical cells. J: Corolla surface of tobacco expressing SIMYB17-1, J1 labels ectopic conical cells. K: Anther surface of tobacco ectopically expressing SIMYB17-2, K1 labels ectopic guard cells on top of cell outgrowths. L: Ovary surface of tobacco ectopically expressing SIMYB17-2. M: Adaxial leaf surface of tobacco expressing SIMYB17-2, M1 labels ectopic branched trichome. N: Abaxial leaf surface of tobacco expressing SIMYB17-2. O: Corolla surface of tobacco expressing SIMYB17-2, O1 labels ectopic conical cells, O2 labels ectopic trichome.

Figure 4

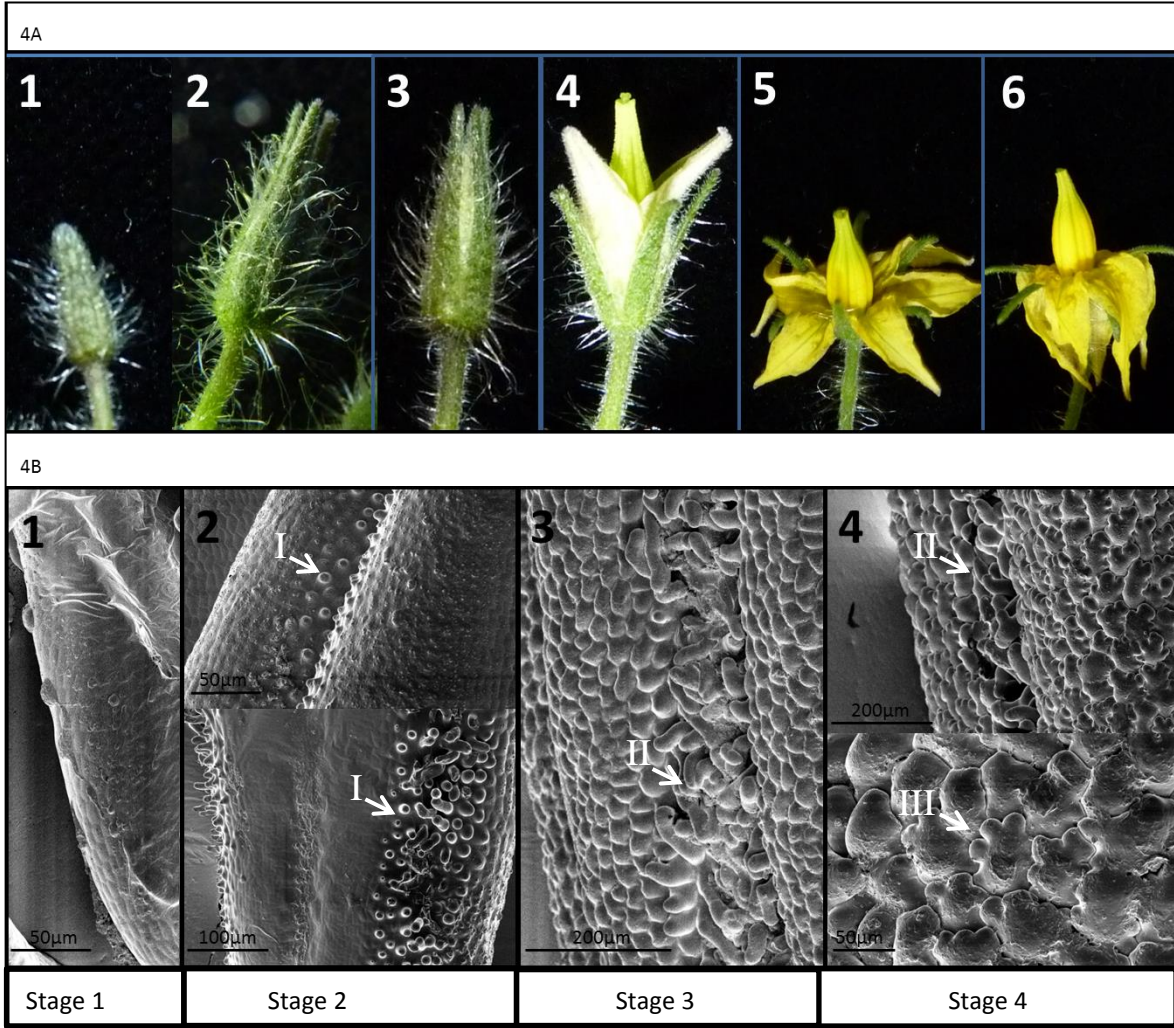

**Figure 4: The stages of floral development and the anther epidermal cell outgrowths of *Solanum lycopersicum*.**

A. Six stages of tomato flower development chosen to reflect the development of the epidermal cell outgrowths on tomato anthers. B. SEM images of anther surface at stages 1 to 4. Epidermal cell outgrowths begin to develop at stage 2 (I). By stage 3 the anther trichome mesh (II) is almost completely formed and other papillae have begun to form on the anther surface. The papillae on the anther surface take on a distinctive ‘glove-like’ multilobed (III) appearance during stage 4.

Figure 5

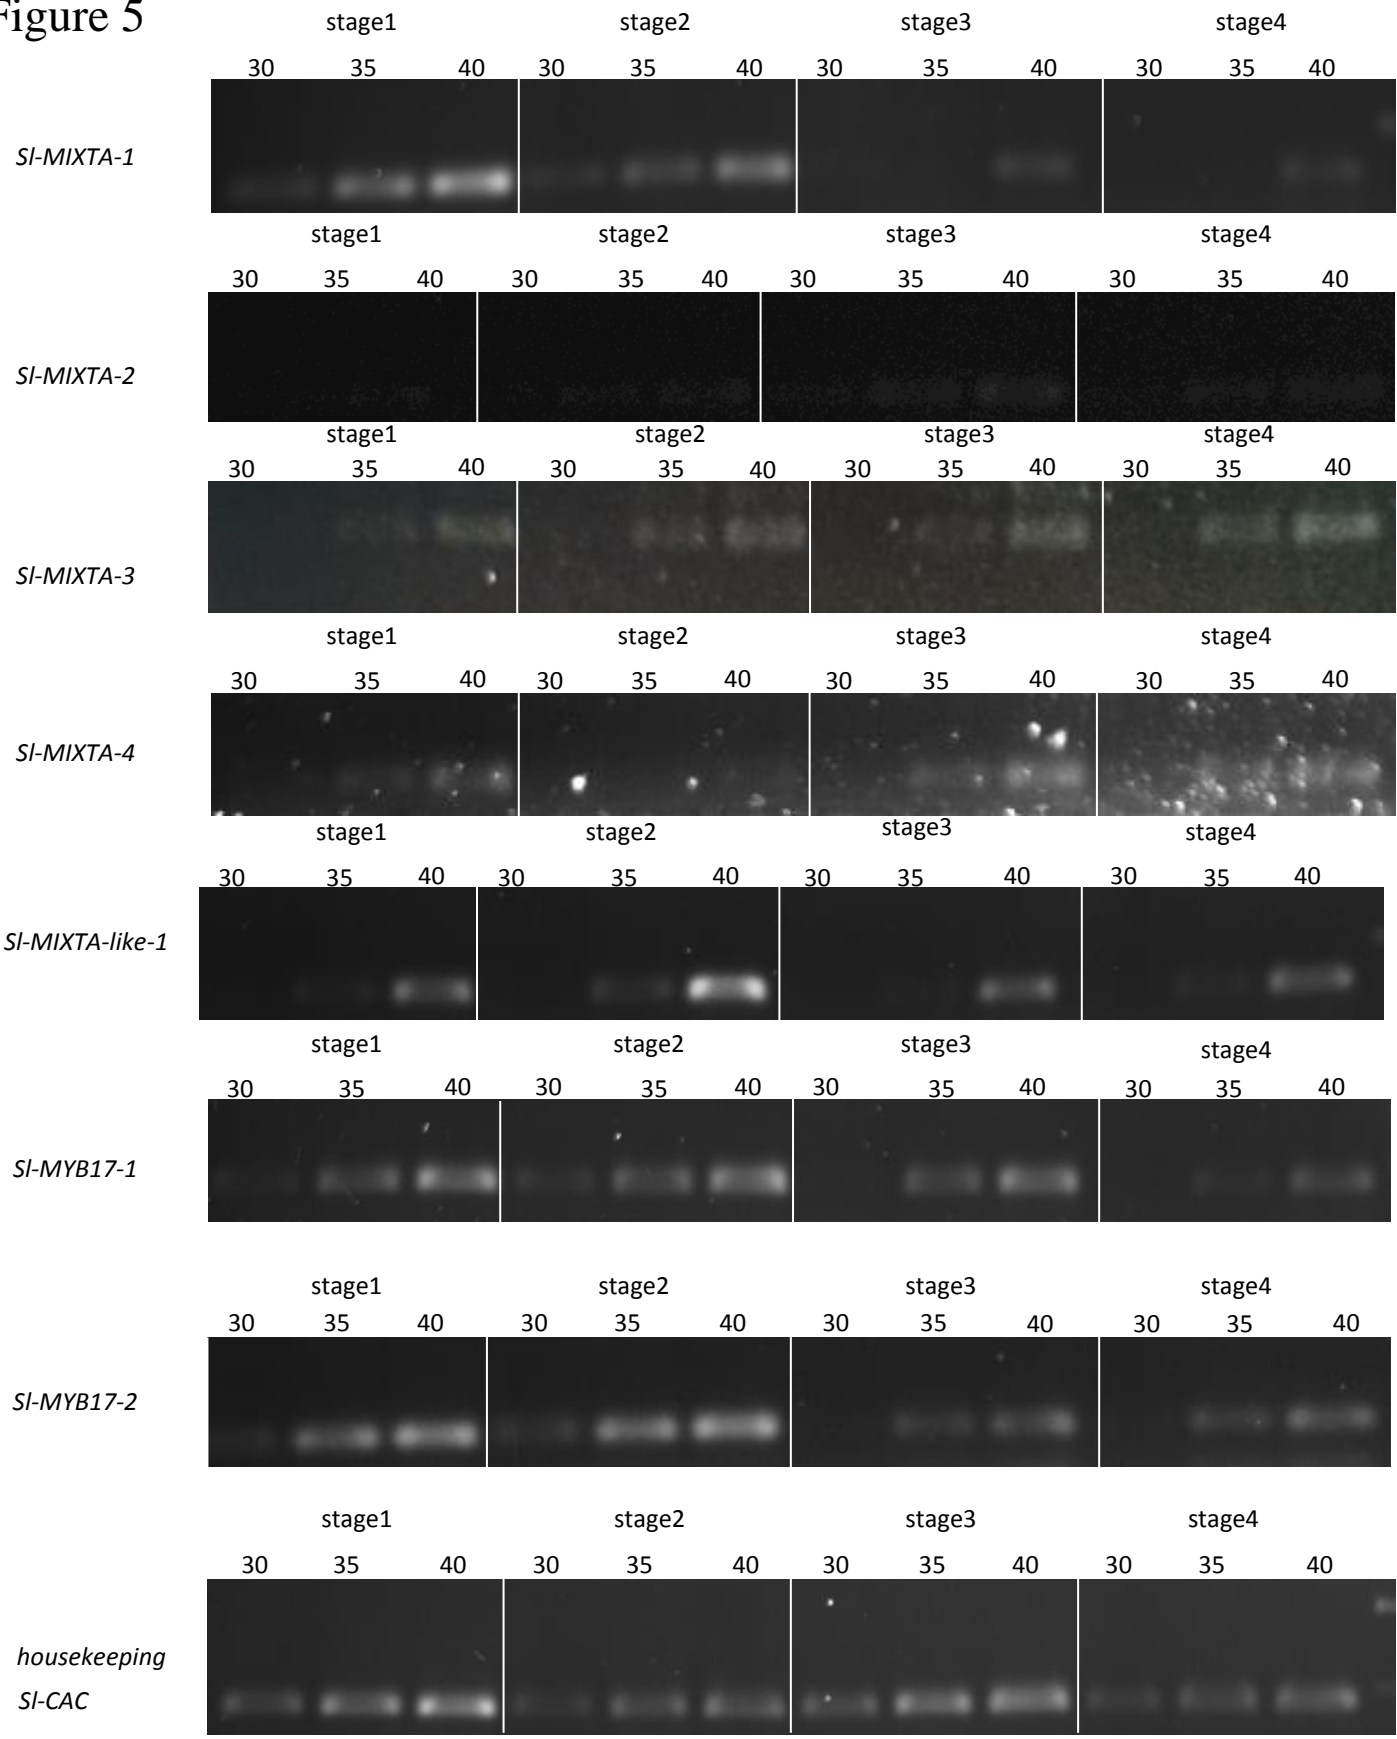

**Figure 5: Semi quantitative RT PCR analysis of expression of all Solanum lycopersicum R2R3 MYB subgroup 9 genes during development of the flower.**

Stages 1 to 4 are the first 4 developmental stages shown in Figure 4. Flower developmental stages are labelled above each lane, and the number of cycles is indicated. Positive and negative controls were conducted for each primer set (not shown): the positive control was the same primers amplifying from a plasmid containing the sequenced gene, the negative control was the same primers with only water. SICAC was used as a reference gene (lower panels).
